# Supplementary material for: Structural fingerprints of yielding mechanisms in attractive colloidal gels
Source: Royal Society of Chemistry journal article supplement (doi:10.1039/c6sm00750c), 2016-11-24
Supplement: c6sm00750c1.pdf [file c6sm00750c1.pdf]

## Supplementary Figure:

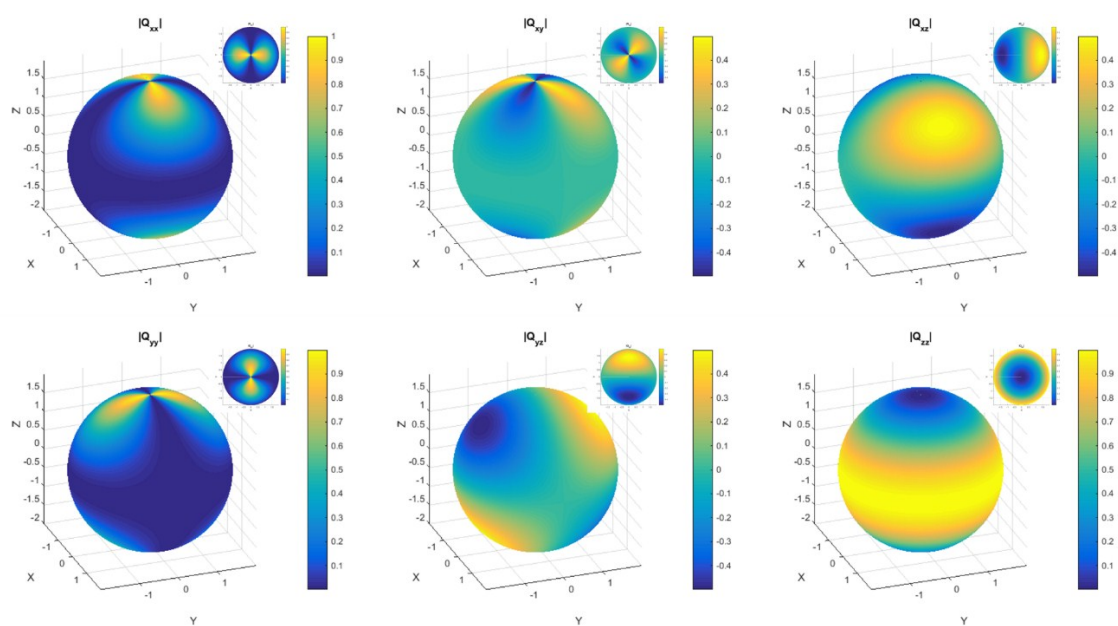

Figure S. 1 3D representation of the elements of the fabric tensor presented on a unit sphere. The insets show the distribution of the elements in x-y plane with horizontal axis (X) and vertical axis (Y)

$$Q_{ij} = \mathbf{n}_{ij} \otimes \mathbf{n}_{ij} = \begin{bmatrix} Q_{xx} & Q_{xy} & Q_{xz} \\ Q_{yx} & Q_{yy} & Q_{yz} \\ Q_{zx} & Q_{zy} & Q_{zz} \end{bmatrix}$$
